# Supplementary material for: Erklärbarkeit der altersadjustierten Übersterblichkeit mit den COVID-19-attribuierten Sterbefällen von Januar 2020 bis Juli 2021
Source: Springer Nature journal article supplement (doi:10.1007/s00103-021-03465-z), 2021-12-04
Supplement: MOESM1 [file 19932350]

**Onlinematerial zum Beitrag**

**Erklärbarkeit der altersadjustierten Übersterblichkeit mit den COVID-19-attribuierten Sterbefällen von Januar 2020 bis Juli 2021**

Daniel Wollschläger<sup>1</sup>, Irene Schmidtmann<sup>1</sup>, Sebastian Fückel<sup>2</sup>, Maria Blettner<sup>1</sup>, Emilio Gianicolo<sup>1,3</sup>

<sup>1</sup> Institut für Medizinische Biometrie, Epidemiologie und Informatik (IMBEI),  
Universitätsmedizin der Johannes Gutenberg-Universität Mainz, Mainz, Deutschland

<sup>2</sup> Statistisches Landesamt Rheinland-Pfalz, Bad Ems, Deutschland

<sup>3</sup> Institute of Clinical Physiology of the Italian National Research Council (IFC-CNR),  
Lecce, Italien

**Korrespondenzadresse:**

PD Dr. Daniel Wollschläger

Institut für Medizinische Biometrie, Epidemiologie und Informatik (IMBEI)

Universitätsmedizin der Johannes Gutenberg-Universität Mainz

Langenbeckstraße 1

55131 Mainz

wollschlaeger@uni-mainz.de

**Inhalt:**

Material und Methoden: Datenquellen, Regressionsmodell

Sensitivitätsanalysen: Anpassung Regression mit Maximum Likelihood, Modell für 2019

Glossar

Tabellen: Geschätzte Koeffizienten Regressionsmodelle, Übersterblichkeit in Bundesländern und Kreisen von Rheinland-Pfalz

# 1 Material und Methoden

## 1.1 Datenquellen

### 1.1.1 Bevölkerungszahlen Rheinland-Pfalz

Das Statistische Landesamt Rheinland-Pfalz stellte Bevölkerungsdaten stratifiziert nach Kreis, Geschlecht und Altersgruppe (10 Jahre) zur Verfügung. Für 2014 bis 2019 lagen die Daten als geprüfte Jahreszahlen zum Stichtag 31. Dezember vor. Für 2019 bis 2021 lagen vorläufige monatliche Zählungen aus der Gemeindestatistik vor (KommWis - Gesellschaft für Kommunikation und Wissenstransfer mbH, Mainz).

Da die Registrierung von Einwohnerinnen und Einwohnern mit einer unbekanntenen Verzögerung erfolgt, sind die monatlichen Zahlen mit Unsicherheit behaftet. Für 2019 lagen die Bevölkerungsdaten sowohl als geprüfte Zahlen zum Jahresende als auch als vorläufige monatliche Zahlen vor. Mithilfe eines Poisson-Regressionsmodells wurden die vorläufigen monatlichen Zahlen für 2019 mit Hilfe der linear interpolierten Zahlen am Jahresende kalibriert. Kovariate war die Altersgruppe, den Offset bildeten die logarithmierten vorläufigen monatliche Zahlen. Die Vorhersagen aus diesem Regressionsmodell wurden als geschätzte monatliche Bevölkerungszahlen für 2019 bis 2021 in allen Analysen verwendet.

### 1.1.2 Sterbefälle

Die Sterbefälle aus den Bundesländern für die Jahre 2015 bis 2021 wurden vom Statistischen Bundesamt als monatliche Zahlen stratifiziert nach Altersgruppe (0-64, 65-74, 75-84, 85+ Jahre) und Geschlecht zur Verfügung gestellt [1]. Für die Jahre 2020 und 2021 waren die Daten vorläufig, Informationen über Sterbefälle außerhalb des Bundeslandes, in dem der Wohnsitz war, waren noch nicht mit anderen Bundesländern ausgetauscht worden.

Das Statistische Landesamt Rheinland-Pfalz lieferte für die Jahre 2015 bis 2019 vollständig verifizierte Sterbefälle stratifiziert nach Landkreis, Geschlecht und Altersgruppe (10 Jahre). Für die Jahre 2020-2021 wurden vorläufige Sterbefälle von den Standesämtern zur Verfügung gestellt und danach einer ersten Qualitätskontrolle unterzogen. Verspätete Korrekturen durch Standesämter sowie der Austausch von Informationen über Sterbefälle außerhalb von Rheinland-Pfalz waren noch nicht durchgeführt worden.

### **1.1.3 Regionaler sozioökonomischer Deprivationsindex**

Als Maß für die regionale sozioökonomische Deprivation wurde der kreisspezifische *German Index of Socioeconomic Deprivation* (GISD) 2014 [2,3] auf Basis von Indikatoren für 2015 bis 2017 verwendet. Für die Jahre 2018 bis 2021 wurde der entsprechende Wert des Jahres 2017 fortgeschrieben. Der Index für jedes Bundesland wurde als bevölkerungsgewichtetes Mittel der entsprechenden kreisspezifischen Werte berechnet.

### **1.1.4 Temperaturdaten Rheinland-Pfalz**

Die Agrarmeteorologie Rheinland-Pfalz stellte die Temperaturdaten in Form täglicher Mittelwerte jeweils aller von ihr sowie vom Deutschen Wetterdienst in Rheinland-Pfalz unterhaltenen Messstationen zur Verfügung. Die Berechnung der kreisspezifischen monatlichen Mittelwerte erfolgte durch Mittelung über alle im jeweiligen Kreis befindlichen Stationen. Da sich im Landkreis Zweibrücken keine Messstation befand, wurden die Temperaturen mit den Durchschnittstemperaturen der übrigen Landesregion Pfalz imputiert, zu der neben Zweibrücken die Kreise Südwestpfalz, Kusel und Kaiserslautern zählen.

### **1.1.5 Saisonale Influenza-Aktivität**

Die Daten zur Aktivität der saisonalen Influenza wurden vom Robert Koch-Institut [4] als wöchentliche kreisspezifische Werte bereitgestellt. Diese Werte wurden teilweise aus Meldungen niedergelassener Ärztinnen und Ärzte abgeleitet und können deshalb an Feiertagen, an denen Arztpraxen geschlossen waren, nach unten verzerrt sein. Für Weihnachten und Ostern wurde dieser Effekt korrigiert, indem zwischen benachbarten Wochen linear interpoliert wurde, wenn die Aktivität in der Kalenderwoche des Feiertags niedriger war als sowohl die Aktivität in der vorangehenden als auch in der folgenden Kalenderwoche. Zur Ableitung der monatlichen saisonalen Influenza-Aktivität wurde jede Kalenderwoche dem Monat des entsprechenden Mittwochs zugeordnet.

### **1.1.6 COVID-19-attribuierte Sterbefälle**

Vom Robert Koch-Institut wurden zwei Datensätze zur COVID-19-attribuierten Mortalität zur Verfügung gestellt. Die für die Analyse auf Ebene der Bundesländer verwendeten Daten wurden bereits in einer früheren Auswertung des Statistischen Bundesamtes [1] verwendet. In diesem Datensatz wurde die wöchentliche Anzahl der verstorbenen COVID-19-Fälle (Meldungen gemäß Infektionsschutzgesetz) nach dem Sterbedatum erfasst [5]. Zur Ableitung der monatlichen Sterbefälle wurde jede Kalenderwoche dem Monat des entsprechenden Mittwochs zugeordnet.

Wöchentliche bundeslandspezifische COVID-19-attribuierte Sterbefälle mit einer Häufigkeit von 1 bis 3 wurden dabei nur in der Form "<4" angegeben. Um diese Werte zu imputieren, wurde die Differenz zwischen der Summe aller genau angegebenen bundeslandspezifischen Werte und der Gesamtzahl für Deutschland für dieselbe Woche gleichmäßig auf die Bundesländer mit "<4"-Angaben verteilt. In der Kalenderwoche

10/2020 wurde die deutsche Gesamtzahl ebenfalls als “<4” erfasst. In diesem Fall wurden die zwei bundeslandspezifischen “<4”-Angaben jeweils auf 1 gesetzt.

Die für die Analyse auf Kreisebene in Rheinland-Pfalz verwendeten COVID-19-attribuierten Sterbefälle sind eine Teilmenge der Meldungen gemäß Infektionsschutzgesetz, die im COVID-19-Dashboard des Robert Koch-Instituts [6] dargestellt sind. COVID-19-attributierte Sterbefälle wurden nach dem Meldedatum registriert, wenn kein Sterbedatum vorhanden war [7].

## 1.2 Regressionsmodell für Mortalitätsraten

Die Negativ-Binomial Regressionsmodelle wurden mit der Hamilton Monte Carlo-Methode angepasst, wie sie im Paket brms [8] für die Bayes’sche Modellierungssprache Stan [9] implementiert ist. Mit  $\mu$  als Erwartungswert der Sterbefälle in einer Poisson-Zelle,  $\beta_0$  als Rate der Sterbefälle, wenn alle stetigen Kovariaten gleich 0 und alle kategorialen Kovariaten gleich der Referenzkategorie sind sowie den weiteren Parametern  $\beta$  als Koeffizienten der Prädiktoren lautet die Modellgleichung:

$$\begin{aligned} \ln\mu = & \beta_0 + \\ & \beta_1 \text{GISD} + \\ & \beta_2 \text{Temp}_{<18} + \beta_3 \text{Temp}_{>18} + \\ & \beta_4 \text{Datum numerisch} + \beta_5 \sin(\text{Datum}_{[0,2\pi]}) + \beta_6 \cos(\text{Datum}_{[0,2\pi]}) \\ & \beta_7 \text{Influenza} + \\ & \beta_8 \text{Geschlecht}_{\text{männlich}} + \\ & \beta_9 \text{Alter}_{\text{Gruppe 2}} + \beta_{\dots} \text{Alter}_{\text{Gruppe } \dots} + \\ & \beta_{\dots} \text{Geschlecht}_{\text{männlich}} \times \text{Alter}_{\text{Gruppe 2}} + \\ & \beta_{\dots} \text{Geschlecht}_{\text{männlich}} \times \text{Alter}_{\text{Gruppe } \dots} + \\ & \ln \text{Personenjahre} \end{aligned}$$

$\text{Temp}_{<18}$  und  $\text{Temp}_{>18}$  stehen für die beiden stückweise linearen Spline-Terme mit innerem Knoten bei 18°C.  $\text{Datum}_{[0,2\pi]}$  steht für das auf das Intervall  $[0,2\pi]$  reskalierte numerische Datum. Im Modell auf Ebene der Bundesländer sind die Altersgruppen 0-64

Jahre (Referenzgruppe), 65-74 Jahre, 75-84 Jahre, 85+ Jahre. Im Modell für die Kreise in Rheinland-Pfalz sind die Altersgruppen 0-9 Jahre, 10-19 Jahre, 20-29 Jahre, 30-39 Jahre (Referenzgruppe), 40-49 Jahre, 50-59 Jahre, 60-69 Jahre, 70-79 Jahre, 80-89 Jahre, 90+ Jahre.

Für  $\beta_0$  wurde als Prior eine Normalverteilung mit Mittelwert 0 und Standardabweichung 15 verwendet. Für die übrigen Regressionsparameter wurde als Prior jeweils eine Normalverteilung mit Mittelwert 0 und Standardabweichung 5 verwendet. Aus 20 Markov-Ketten mit jeweils einer Aufwärmphase von 5.000 Ziehungen, gefolgt von 5.000 Ziehungen mit einem Ausdünnungsintervall von 5 wurden insgesamt 20.000 Ziehungen pro Modell beibehalten.

Die Qualität des Monte-Carlo-Samplings wurde anhand diagnostischer Diagramme für die Autokorrelation in jeder Markov-Kette sowie für die Mischung der Ketten bzgl. jedes Parameterschätzers bewertet. Es gab keine Parameter mit einem effektiven Stichprobenumfang von weniger als 80% des gesamten Stichprobenumfangs oder mit einem  $\hat{R}$ -Wert über 1,01.

## 2 Sensitivitätsanalysen

### 2.1 Anpassung der Regression mit Maximum-Likelihood-Methode

#### 2.1.1 Bundesländer Deutschland

Referenzkategorie für den Faktor Altersgruppe: 0-64 Jahre. Referenzkategorie für den Faktor Geschlecht: weiblich.

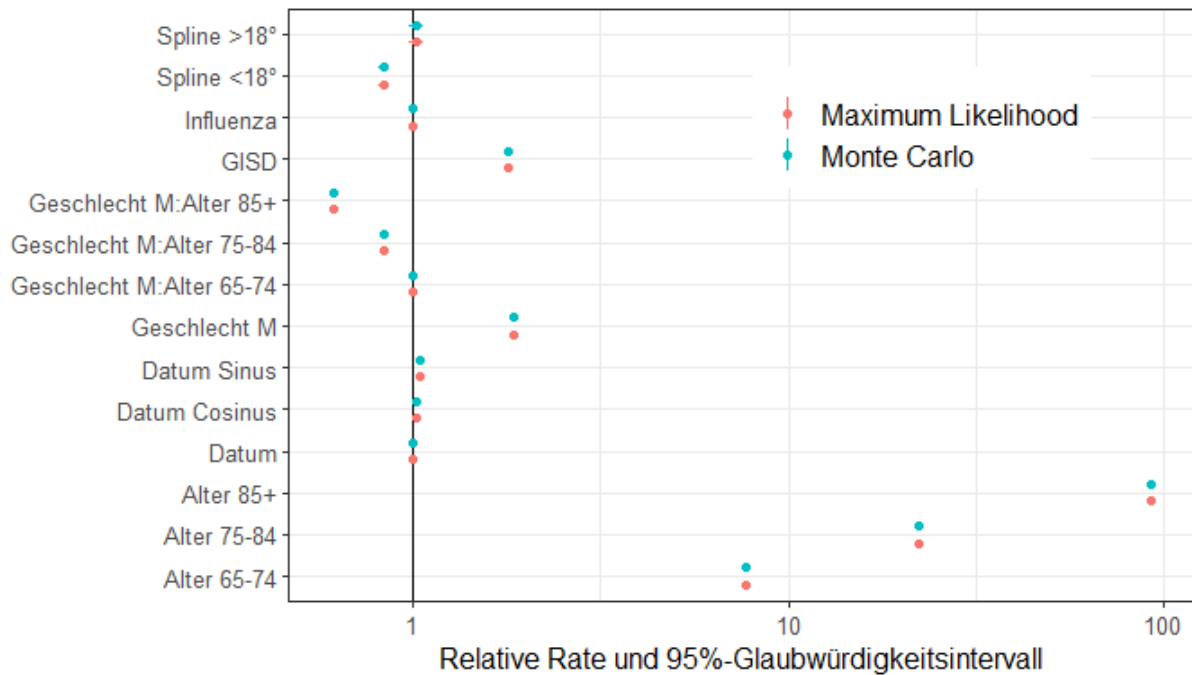

Abbildung Z1: Geschätzte relative Raten (RR) mit 95%-Glaubwürdigkeitsintervallen (Monte-Carlo-Fit) und 95%-Konfidenzintervallen (Maximum-Likelihood-Fit) für das Negativ-Binomial-Regressionsmodell für Mortalitätsraten von 2015 bis 2019 in Deutschland.

## 2.1.2 Kreise in Rheinland-Pfalz

Referenzkategorie für den Faktor Altersgruppe: 30-39 Jahre. Referenzkategorie für den Faktor Geschlecht: weiblich.

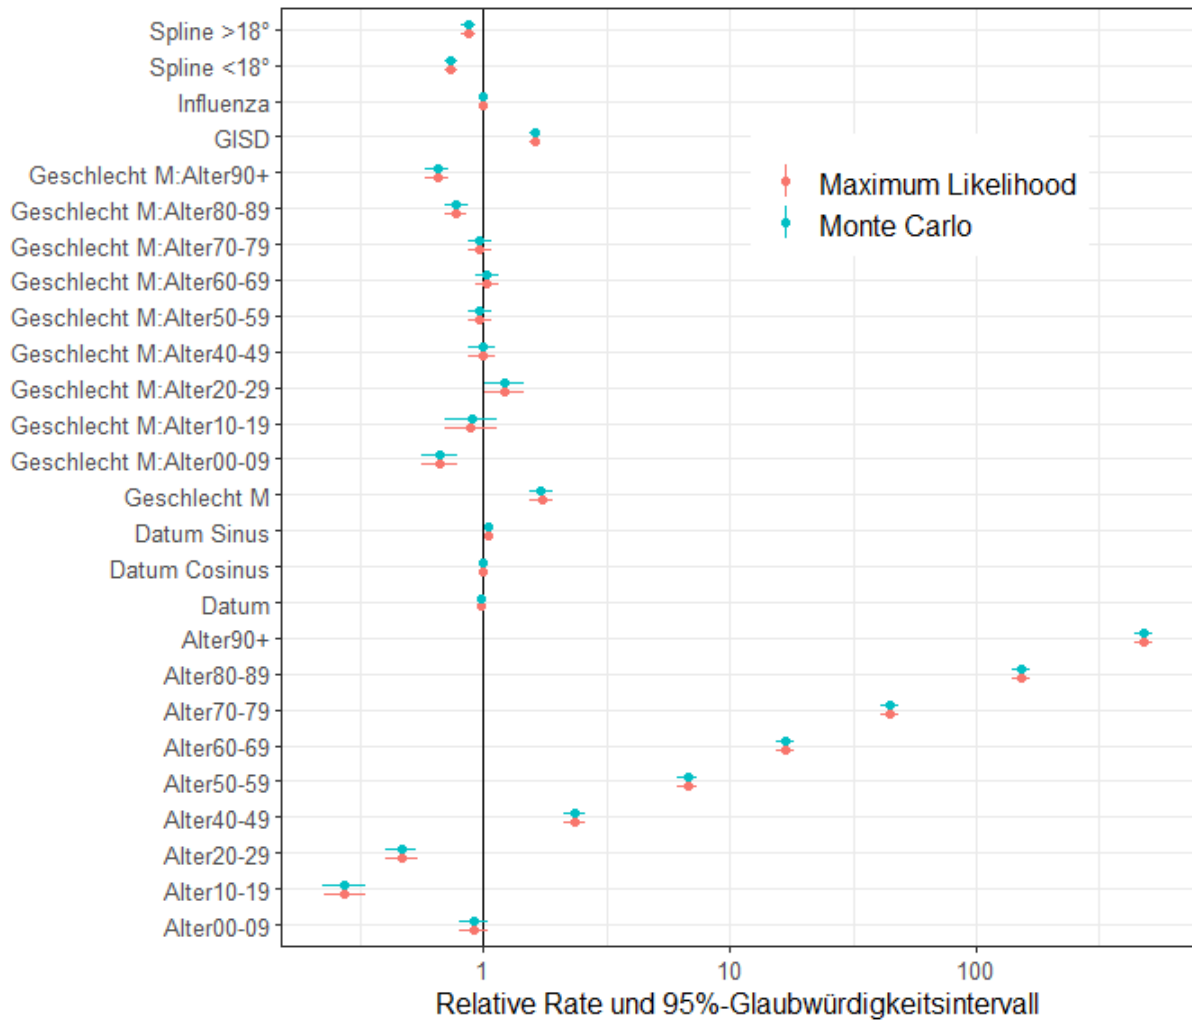

Abbildung Z2: Geschätzte relative Raten (RR) mit 95%-Glaubwürdigkeitsintervallen (Monte-Carlo-Fit) und 95%-Konfidenzintervallen (Maximum-Likelihood-Fit) für das Negativ-Binomial-Regressionsmodell für Mortalitätsdaten von 2015 bis 2019 in Rheinland-Pfalz.



## 2.2 Vergleich zwischen beobachteten und vorhergesagten Sterbefällen im Jahr 2019

Um zu überprüfen, ob die gewählte Regressionsmodellierung zu unverzerrten Schätzungen der zu erwartenden Sterbefälle in Abwesenheit einer Pandemie führt, wurden die Regressionsmodelle auch an Daten von 2015 bis 2018 angepasst, um die beobachtete und vorhergesagte Sterblichkeit im Jahr 2019 vergleichen zu können.

### 2.2.1 Bundesländer in Deutschland

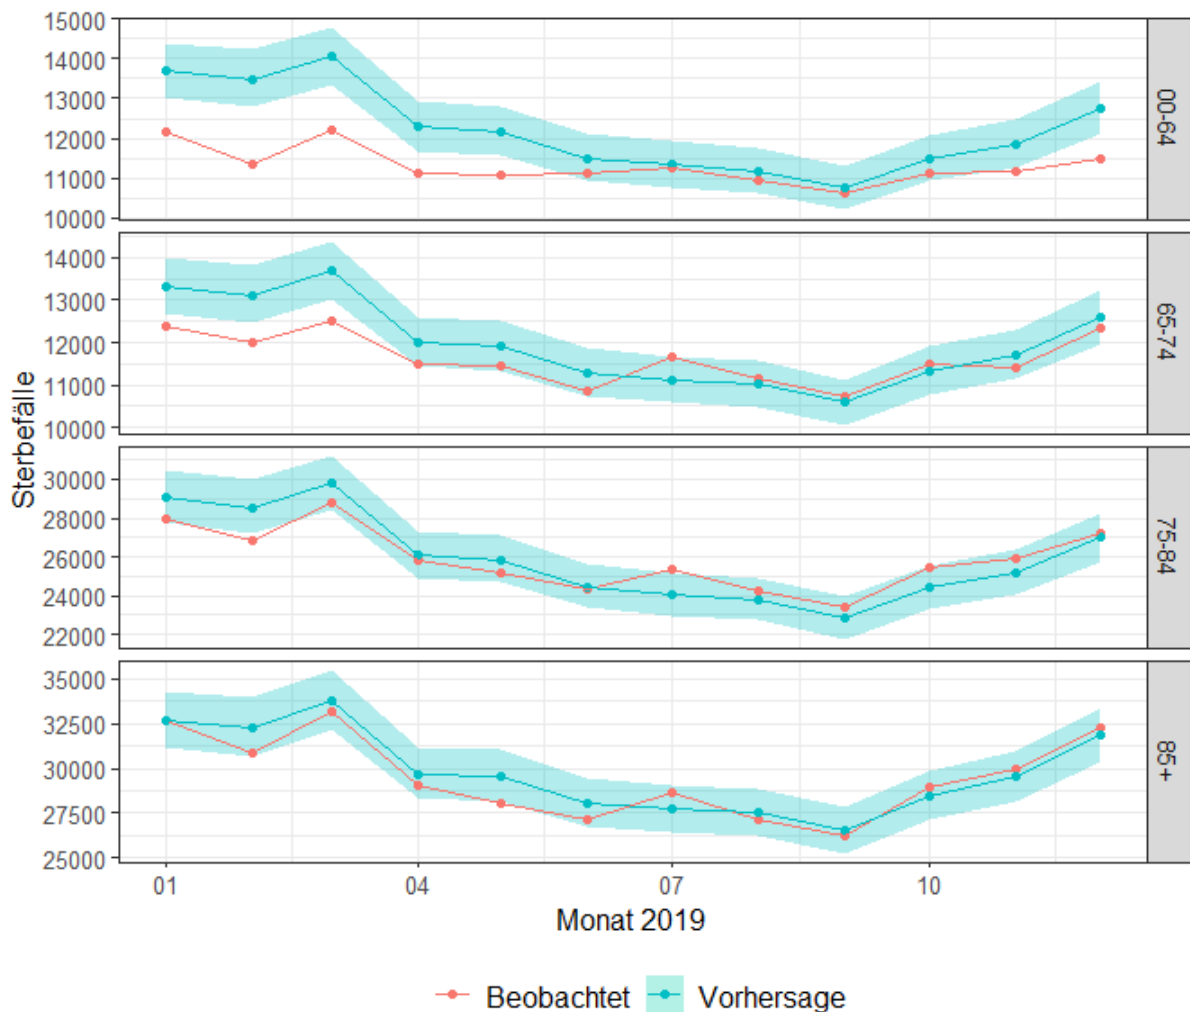

Abbildung Z3: Beobachtete und vorhergesagte Sterbefälle in Deutschland im Jahr 2019, stratifiziert nach Altersgruppen, basierend auf einem Negativ-Binomial-Regressionsmodell, das an Daten aus den Jahren 2015 bis 2018 angepasst wurde, einschließlich 95%-

Vorhersageintervalle für die vorhergesagten Sterbefälle.

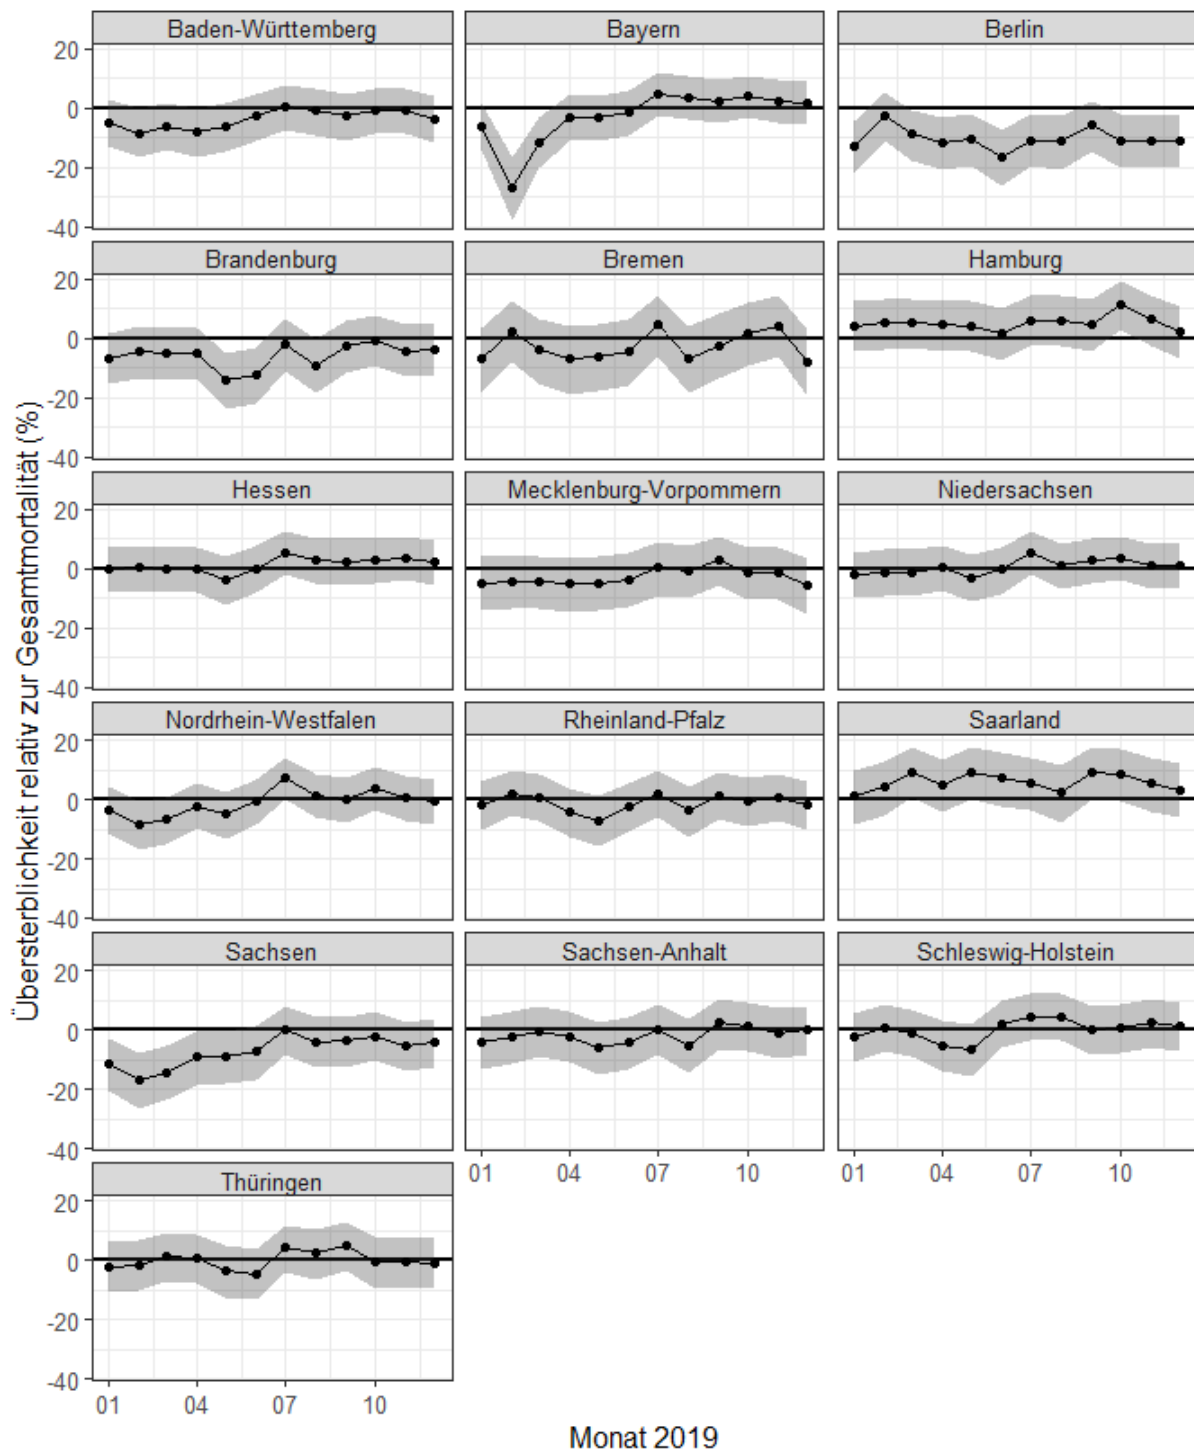

Abbildung Z4: Übersterblichkeit relativ zur Gesamtmortalität in Deutschland im Jahr 2019, stratifiziert nach Bundesland, basierend auf einem Negativ-Binomial-Regressionsmodell, das an Daten aus den Jahren 2015 bis 2018 angepasst wurde, einschließlich 95%-Vorhersageintervalle.

## 2.2.2 Kreise in Rheinland-Pfalz

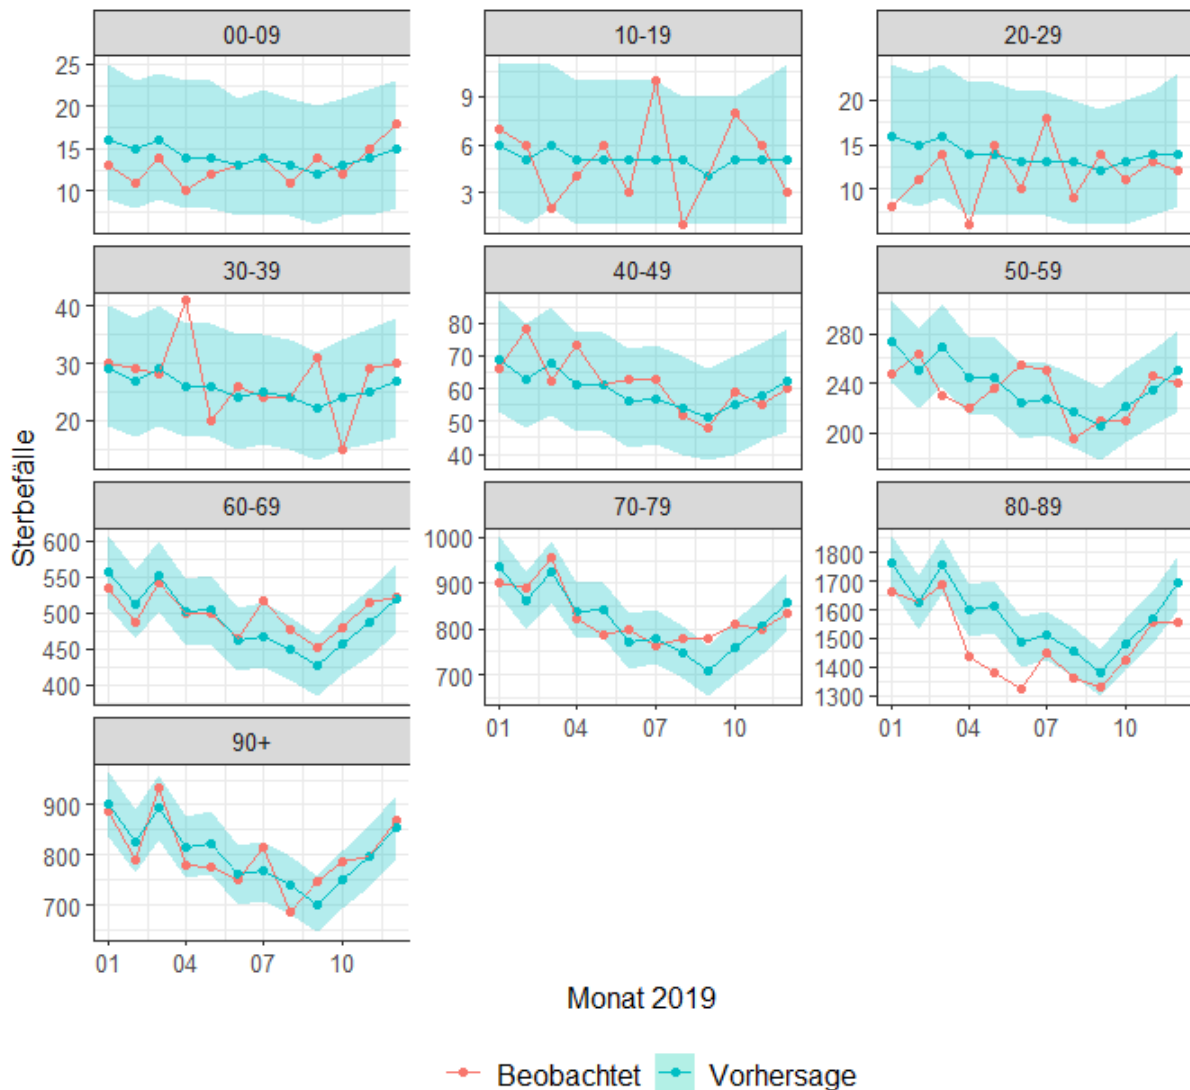

Abbildung Z5: Beobachtete und vorhergesagte Sterbefälle in Rheinland-Pfalz im Jahr 2019, stratifiziert nach Altersgruppen, basierend auf einem Negativ-Binomial-Regressionsmodell, das an Daten aus den Jahren 2015 bis 2018 angepasst wurde, einschließlich 95%-Vorhersageintervalle für die vorhergesagten Sterbefälle.

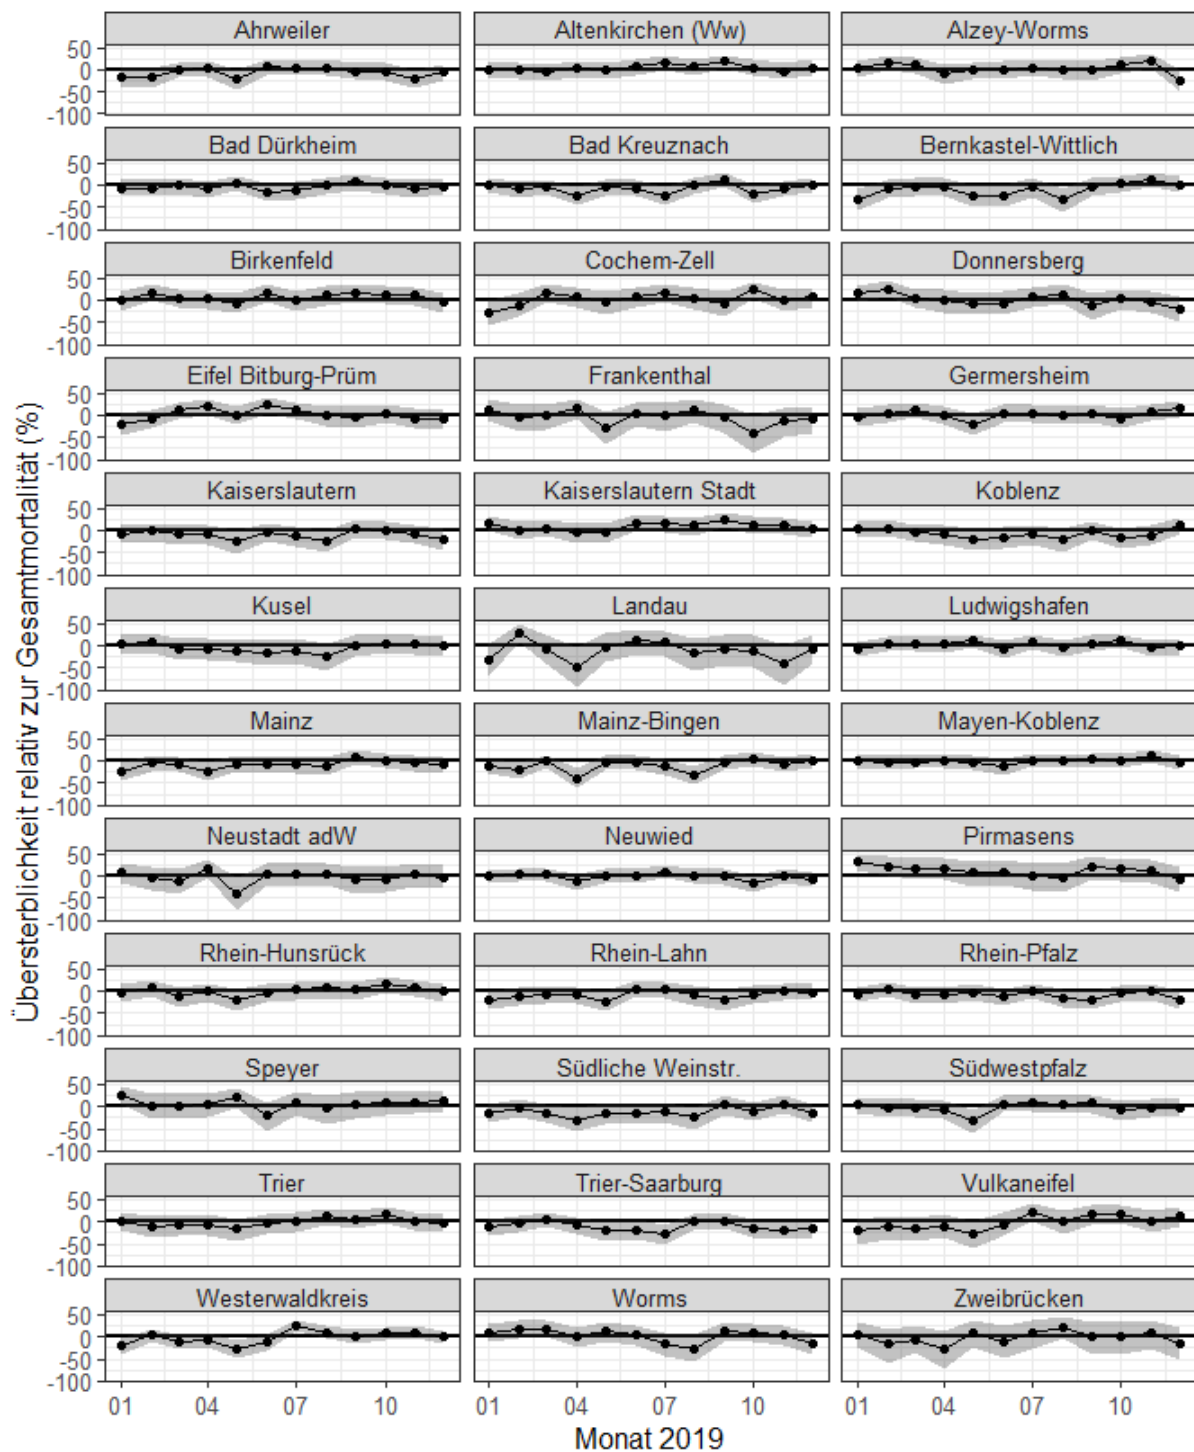

Abbildung Z6: Übersterblichkeit relativ zur Gesamtmortalität in Rheinland-Pfalz im Jahr 2019, stratifiziert nach Kreis, basierend auf einem Negativ-Binomial-Regressionsmodell, das an Daten aus den Jahren 2015 bis 2018 angepasst wurde, einschließlich 95%-Vorhersageintervalle.

### 3 Glossar

#### **Mortalitätsrate**

Anzahl der Sterbefälle pro Zeiteinheit.

#### **Negativ-Binomial-Regressionsmodell**

Statistisches Modell ähnlich der Poisson-Regression, in dem die logarithmierte Ereignisrate als Zielgröße linear modelliert wird. Im Unterschied zur Poisson-Regression wird zugelassen, dass die Varianz der Häufigkeiten größer als ihr Erwartungswert ist.

#### **Poisson-Zelle**

Beobachtungseinheit des Negativ-Binomial-Regressionsmodells. Pro Zelle geht jeweils ein Wert für den betrachteten Endpunkt (Ereignishäufigkeit) sowie für jede Kovariate in das Modell ein. Die Poisson-Zellen werden aus der vollständigen Kreuzklassifikation der kategorialen Kovariaten gebildet.

#### **Offset**

Der exponenzierte *Offset* ist der Faktor, mit dem die im Regressionsmodell modellierte Ereignisrate multipliziert wird, um die in einer Poisson-Zelle beobachtete Häufigkeit zu erhalten. Der Offset ist gleich der logarithmierten *Personenzeit* in einer Poisson-Zelle. Die Personenzeit ist die gesamte Zeit, die alle in einer Poisson-Zelle erfassten Personen in diese Zelle einbringen.

#### **Stückweise linearer Spline**

Eine in Segmenten abschnittsweise lineare Funktion mit potentiell unterschiedlicher Steigung je Segment. Im gewählten Modell wurde zusätzlich festgelegt, dass sich die

Segmente am Bruchpunkt (*Knoten*) zwischen ihnen berühren, die Funktion also kontinuierlich ist.

#### **Posterior-Verteilung**

Im Monte-Carlo-Verfahren auf Basis von simulierten Zufallsprozessen ermittelte statistische Verteilung der vorhergesagten Häufigkeit. In die Verteilung fließt sowohl die Unsicherheit in der Schätzung der Parameter des Regressionsmodells für den Erwartungswert ein als auch die Varianz der beobachteten Häufigkeiten bei gegebenem Erwartungswert.

#### **BCa Bootstrap-Konfidenzintervall**

Verfahren zur Bestimmung des Konfidenzintervalls für einen statistischen Parameter auf Basis von *Bootstrapping*.

*Bootstrapping: Resampling* Verfahren, das die Verteilung des Parameterschätzers nicht parametrisch berechnet sondern aus mehrfachen mit Zurücklegen gebildeten Ziehungen der empirisch beobachteten Werte bildet.

*BCa (Bias corrected and accelerated)* - Verfahren zur Berechnung des Konfidenzintervalls, das bei schiefen Verteilungen sicherstellt, dass die tatsächliche Abdeckungswahrscheinlichkeit der nominellen (95%) entspricht.

## 4 Tabellen

*Tabelle Z1: Geschätzte relative Mortalitätsraten (RR) und 95%-Unsicherheitsintervalle (RR 2,5%, RR 97,5%) für das Negativ-Binomial-Regressionsmodell für Mortalitätsdaten von 2015 bis 2019 in Deutschland. GISD: German Index of Socioeconomic Deprivation*

| Koeffizient               | RR    | RR 2,5% | RR 97,5% |
|---------------------------|-------|---------|----------|
| Datum Sinus               | 1,04  | 1,03    | 1,04     |
| Datum Cosinus             | 1,02  | 1,00    | 1,03     |
| GISD                      | 1,80  | 1,75    | 1,84     |
| Spline <18°               | 0,83  | 0,80    | 0,86     |
| Spline >18°               | 1,02  | 0,97    | 1,07     |
| Datum                     | 0,99  | 0,99    | 1,00     |
| Influenza                 | 1,00  | 1,00    | 1,00     |
| Geschlecht M              | 1,85  | 1,83    | 1,87     |
| Alter 65-74               | 7,67  | 7,59    | 7,76     |
| Alter 75-84               | 22,36 | 22,13   | 22,59    |
| Alter 85+                 | 93,26 | 92,31   | 94,20    |
| Geschlecht M: Alter 65-74 | 1,00  | 0,99    | 1,02     |
| Geschlecht M: Alter 75-84 | 0,83  | 0,82    | 0,84     |
| Geschlecht M: Alter 85+   | 0,61  | 0,60    | 0,62     |

*Tabelle Z2: Geschätzte relative Mortalitätsraten (RR) und 95%-Unsicherheitsintervalle (RR 2,5%, RR 97,5%) für das Negativ-Binomial-Regressionsmodell für Mortalitätsdaten von 2015 bis 2019 in Rheinland-Pfalz. GISD: German Index of Socioeconomic Deprivation*

| Koeffizient               | RR     | RR 2,5% | RR 97,5% |
|---------------------------|--------|---------|----------|
| Datum Sinus               | 1,04   | 1,03    | 1,05     |
| Datum Cosinus             | 0,99   | 0,97    | 1,01     |
| GISD                      | 1,63   | 1,55    | 1,70     |
| Spline <18°               | 0,74   | 0,70    | 0,78     |
| Spline >18°               | 0,88   | 0,82    | 0,94     |
| Datum                     | 0,99   | 0,98    | 0,99     |
| Influenza                 | 1,00   | 1,00    | 1,00     |
| Geschlecht M              | 1,72   | 1,55    | 1,91     |
| Alter 0-09                | 0,92   | 0,80    | 1,04     |
| Alter 10-19               | 0,27   | 0,22    | 0,33     |
| Alter 20-29               | 0,46   | 0,40    | 0,54     |
| Alter 40-49               | 2,34   | 2,13    | 2,58     |
| Alter 50-59               | 6,73   | 6,17    | 7,35     |
| Alter 60-69               | 16,84  | 15,48   | 18,35    |
| Alter 70-79               | 44,79  | 41,20   | 48,80    |
| Alter 80-89               | 151,70 | 139,69  | 165,27   |
| Alter 90+                 | 478,37 | 440,38  | 521,28   |
| Geschlecht M: Alter 0-09  | 0,67   | 0,56    | 0,79     |
| Geschlecht M: Alter 10-19 | 0,90   | 0,70    | 1,15     |



---

| Koeffizient               | RR   | RR 2,5% | RR 97,5% |
|---------------------------|------|---------|----------|
| Geschlecht M: Alter 20-29 | 1,22 | 1,02    | 1,47     |
| Geschlecht M: Alter 40-49 | 0,99 | 0,88    | 1,12     |
| Geschlecht M: Alter 50-59 | 0,97 | 0,87    | 1,08     |
| Geschlecht M: Alter 60-69 | 1,04 | 0,93    | 1,15     |
| Geschlecht M: Alter 70-79 | 0,97 | 0,87    | 1,07     |
| Geschlecht M: Alter 80-89 | 0,78 | 0,70    | 0,86     |
| Geschlecht M: Alter 90+   | 0,65 | 0,59    | 0,72     |

---

*Tabelle Z3: Gesamte COVID-19 zugeschriebene Sterbefälle und Übersterblichkeit mit 95%-Vorhersageintervallen von 01/2020 bis 07/2021 in deutschen Bundesländern. Die Sterbefälle werden als absolute Anzahl, als Sterbefälle pro 100.000 Einwohner und als Sterbefälle relativ zur Gesamtmortalität (%) angegeben.*

| Bundesland  | Bevölkerung | Absolute Todesfälle |                   | Todesfälle/100.000 Einwohner |                   | Todesfälle/Gesamtmortalität |                   |
|-------------|-------------|---------------------|-------------------|------------------------------|-------------------|-----------------------------|-------------------|
|             |             | COVID-19            | Übersterblichkeit | COVID-19                     | Übersterblichkeit | COVID-19                    | Übersterblichkeit |
| Baden-      | 11.116.092  | 1.0397              | -1.356            | 93,6                         | -12               | 5,7                         | -0,7              |
| Württemberg |             |                     | [-15.638; 12.147] |                              | [-141; 109]       |                             | [-8,6; 6,6]       |
| Bayern      | 13.145.594  | 15.208              | 9.848             | 115,7                        | 75                | 6,7                         | 4,4               |
|             |             |                     | [-6.902; 25.707]  |                              | [-53; 196]        |                             | [-3,1; 11,4]      |
| Berlin      | 3.674.319   | 3.501               | -1.970            | 95,4                         | -53               | 5,9                         | -3,3              |
|             |             |                     | [-6.998; 2.814]   |                              | [-190; 77]        |                             | [-11,8; 4,7]      |
| Brandenburg | 2.528.639   | 3.791               | 1.752             | 149,8                        | 69                | 6,7                         | 3,1               |
|             |             |                     | [-2.877; 6.132]   |                              | [-114; 242]       |                             | [-5,1; 10,9]      |
| Bremen      | 680.411     | 499                 | 176               | 73,4                         | 26                | 3,9                         | 1,4               |
|             |             |                     | [-1.191; 1.473]   |                              | [-175; 216]       |                             | [-9,3; 11,5]      |

| Bundesland                 | Bevölkerung | Absolute Todesfälle |                   | Todesfälle/100.000 Einwohner |                   | Todesfälle/Gesamtmortalität |                   |
|----------------------------|-------------|---------------------|-------------------|------------------------------|-------------------|-----------------------------|-------------------|
|                            |             | COVID-19            | Übersterblichkeit | COVID-19                     | Übersterblichkeit | COVID-19                    | Übersterblichkeit |
| Hamburg                    | 1.853.220   | 1.628               | 2.573             | 87,8                         | 139               | 5,6                         | 8,9               |
|                            |             |                     | [124; 4.885]      |                              | [7; 264]          |                             | [0,4; 16,8]       |
| Hessen                     | 6.296.061   | 7.356               | 7.265             | 116,8                        | 115               | 6,6                         | 6,5               |
|                            |             |                     | [-1.022; 15.109]  |                              | [-16; 240]        |                             | [-0,9; 13,5]      |
| Mecklenburg-<br>Vorpommern | 1.609.047   | 1.187               | -434              | 73,8                         | -27               | 3,3                         | -1,2              |
|                            |             |                     | [-3.650; 2.606]   |                              | [-227; 162]       |                             | [-10,2; 7,3]      |
| Niedersachsen              | 8.002.109   | 5.803               | 4.758             | 72,5                         | 59                | 3,8                         | 3,1               |
|                            |             |                     | [-6.966; 15.880]  |                              | [-87; 198]        |                             | [-4,5; 10,3]      |
| Nordrhein-<br>Westfalen    | 17.933.955  | 17.283              | 10.524            | 96,4                         | 59                | 5,1                         | 3,1               |
|                            |             |                     | [-14.868; 34.476] |                              | [-83; 192]        |                             | [-4,4; 10,1]      |

| Bundesland         | Bevölkerung | Absolute Todesfälle |                   | Todesfälle/100.000 Einwohner |                   | Todesfälle/Gesamtmortalität |                   |
|--------------------|-------------|---------------------|-------------------|------------------------------|-------------------|-----------------------------|-------------------|
|                    |             | COVID-19            | Übersterblichkeit | COVID-19                     | Übersterblichkeit | COVID-19                    | Übersterblichkeit |
| Rheinland-Pfalz    | 4.097.399   | 3.714               | 1.329             | 90,6                         | 32                | 4,8                         | 1,7               |
|                    |             |                     | [-4.931; 7.226]   |                              | [-120; 176]       |                             | [-6,3; 9,3]       |
| Saarland           | 984.449     | 1.003               | 1.573             | 101,9                        | 160               | 4,6                         | 7,2               |
|                    |             |                     | [-400; 3.443]     |                              | [-41; 350]        |                             | [-1,8; 15,8]      |
| Sachsen            | 4.063.732   | 10.103              | 6.076             | 248,9                        | 150               | 10,2                        | 6,1               |
|                    |             |                     | [-1.619; 13.333]  |                              | [-39; 329]        |                             | [-1,6; 13,5]      |
| Sachsen-Anhalt     | 2.182.831   | 3.471               | 3.595             | 159,3                        | 165               | 6,2                         | 6,5               |
|                    |             |                     | [-882; 7.859]     |                              | [-40; 360]        |                             | [-1,6; 14,1]      |
| Schleswig-Holstein | 2.908.823   | 1.626               | -368              | 55,9                         | -13               | 2,9                         | -0,7              |
|                    |             |                     | [-5.124; 4.144]   |                              | [-176; 142]       |                             | [-9,1; 7,3]       |

|            |             | Absolute Todesfälle |                   | Todesfälle/100.000 Einwohner |                   | Todesfälle/Gesamtmortalität |                   |
|------------|-------------|---------------------|-------------------|------------------------------|-------------------|-----------------------------|-------------------|
|            |             |                     |                   |                              |                   | [%]                         |                   |
| Bundesland | Bevölkerung | COVID-19            | Übersterblichkeit | COVID-19                     | Übersterblichkeit | COVID-19                    | Übersterblichkeit |
| Thüringen  | 2.123.017   | 4.373               | 3.290             | 206,3                        | 155               | 8,7                         | 6,6               |
|            |             |                     | [-749; 7.120]     |                              | [-35; 336]        |                             | [-1,5; 14,2]      |

*Tabelle Z4: Gesamte COVID-19 zugeschriebene Sterbefälle und Übersterblichkeit mit 95%-Vorhersageintervallen von 01/2020 bis 07/2021 in den Kreisen von Rheinland-Pfalz. Die Sterbefälle werden als absolute Anzahl, als Sterbefälle pro 100.000 Einwohner und als Sterbefälle relativ zur Gesamtmortalität (%) angegeben.*

| Kreis                        | Bevölkerung | Absolute Todesfälle |                   | Todesfälle/100.000 Einwohner |                   | Todesfälle/Gesamtmortalität [%] |                   |
|------------------------------|-------------|---------------------|-------------------|------------------------------|-------------------|---------------------------------|-------------------|
|                              |             | COVID-19            | Übersterblichkeit | COVID-19                     | Übersterblichkeit | COVID-19                        | Übersterblichkeit |
| Ahrweiler                    | 131.465     | 54                  | 19                | 41,1                         | 14                | 1,9                             | 0,7               |
|                              |             |                     | [-480; 487]       |                              | [-365; 370]       |                                 | [-17,3; 17,6]     |
| Altenkirchen<br>(Westerwald) | 128.646     | 101                 | 56                | 78,5                         | 43                | 3,9                             | 2,1               |
|                              |             |                     | [-427; 500]       |                              | [-332; 389]       |                                 | [-16,4; 19,2]     |
| Alzey-Worms                  | 130.402     | 124                 | -25               | 94,9                         | -19               | 5,8                             | -1,2              |
|                              |             |                     | [-463; 382]       |                              | [-355; 293]       |                                 | [-21,5; 17,7]     |
| Bad Dürkheim                 | 134.259     | 150                 | 121               | 111,7                        | 90                | 5,4                             | 4,3               |
|                              |             |                     | [-369; 576]       |                              | [-275; 429]       |                                 | [-13,2; 20,6]     |
| Bad<br>Kreuznach             | 159.165     | 142                 | 88                | 89,2                         | 55                | 4,3                             | 2,7               |
|                              |             |                     | [-453; 600]       |                              | [-285; 377]       |                                 | [-13,7; 18,2]     |

| Kreis        | Bevölkerung | Absolute Todesfälle |                   | Todesfälle/100.000<br>Einwohner |                   | Todesfälle/Gesamt mortalität [%] |                   |
|--------------|-------------|---------------------|-------------------|---------------------------------|-------------------|----------------------------------|-------------------|
|              |             | COVID-19            | Übersterblichkeit | COVID-19                        | Übersterblichkeit | COVID-19                         | Übersterblichkeit |
|              |             |                     |                   |                                 |                   |                                  |                   |
| Bernkastel-  | 112.550     | 62                  | -54               | 55,1                            | -48               | 2,8                              | -2,4              |
| Wittlich     |             |                     | [-508; 363]       |                                 | [-451; 322]       |                                  | [-22,8; 16,3]     |
| Birkenfeld   | 81.390      | 92                  | 98                | 113,0                           | 120               | 4,9                              | 5,2               |
|              |             |                     | [-294; 466]       |                                 | [-361; 573]       |                                  | [-15,6; 24,8]     |
| Cochem-Zell  | 61.307      | 61                  | 10                | 99,5                            | 17                | 4,6                              | 0,8               |
|              |             |                     | [-322; 314]       |                                 | [-525; 512]       |                                  | [-24,5; 23,9]     |
| Donnersberg- | 75.353      | 70                  | 28                | 92,8                            | 37                | 4,7                              | 1,9               |
| kreis        |             |                     | [-324; 353]       |                                 | [-430; 468]       |                                  | [-22,0; 23,9]     |
| Eifelkreis   | 98.994      | 31                  | -75               | 31,3                            | -76               | 1,7                              | -4,2              |
| Bitburg-Prüm |             |                     | [-476; 301]       |                                 | [-481; 304]       |                                  | [-26,4; 16,7]     |

| Kreis                       | Bevölkerung | Absolute Todesfälle |                    | Todesfälle/100.000<br>Einwohner |                    | Todesfälle/Gesamt mortalität [%] |                       |
|-----------------------------|-------------|---------------------|--------------------|---------------------------------|--------------------|----------------------------------|-----------------------|
|                             |             | COVID-19            | Übersterblichkeit  | COVID-19                        | Übersterblichkeit  | COVID-19                         | Übersterblichkeit     |
|                             |             |                     |                    |                                 |                    |                                  |                       |
| Frankenthal<br>(Pfalz)      | 48.650      | 53                  | -47<br>[-341; 217] | 108,9                           | -97<br>[-701; 446] | 5,5                              | -4,9<br>[-35,7; 22,7] |
| Germersheim                 | 129.502     | 126                 | 134<br>[-295; 534] | 97,3                            | 103<br>[-228; 412] | 5,6                              | 6,0<br>[-13,2; 23,8]  |
| Kaisers-<br>lautern         | 105.605     | 83                  | -45<br>[-460; 344] | 78,6                            | -43<br>[-436; 326] | 4,2                              | -2,3<br>[-23,4; 17,5] |
| Kaiserslau-<br>tern (Stadt) | 99.489      | 115                 | 61<br>[-340; 434]  | 115,6                           | 61<br>[-342; 436]  | 6,1                              | 3,2<br>[-17,9; 22,8]  |
| Koblenz                     | 112.146     | 154                 | 116<br>[-321; 517] | 137,4                           | 104<br>[-286; 461] | 6,9                              | 5,2<br>[-14,3; 23,1]  |



| Kreis                 | Bevölkerung | Absolute Todesfälle |                   | Todesfälle/100.000 |                   | Todesfälle/Gesamtmortalität [%] |                   |
|-----------------------|-------------|---------------------|-------------------|--------------------|-------------------|---------------------------------|-------------------|
|                       |             | COVID-19            | Übersterblichkeit | COVID-19           | Übersterblichkeit | COVID-19                        | Übersterblichkeit |
|                       |             | Einwohner           |                   |                    |                   |                                 |                   |
| Kusel                 | 69.769      | 69                  | 85                | 98,8               | 122               | 4,3                             | 5,3               |
|                       |             |                     | [-276; 413]       |                    | [-396; 592]       |                                 | [-17,3; 26,0]     |
| Landau in der Pfalz   | 46.921      | 35                  | 2                 | 74,6               | 4                 | 4,4                             | 0,3               |
|                       |             |                     | [-255; 236]       |                    | [-544; 503]       |                                 | [-32,0; 29,6]     |
| Ludwigshafen am Rhein | 173.527     | 336                 | -64               | 193,3              | -37               | 11,2                            | -2,1              |
|                       |             |                     | [-592; 436]       |                    | [-341; 251]       |                                 | [-19,7; 14,5]     |
| Mainz                 | 214.585     | 210                 | 2                 | 97,9               | 1                 | 7,0                             | 0,1               |
|                       |             |                     | [-519; 495]       |                    | [-242; 231]       |                                 | [-17,3; 16,5]     |
| Mainz-Bingen          | 212.233     | 219                 | 73                | 103,2              | 34                | 6,3                             | 2,1               |
|                       |             |                     | [-489; 604]       |                    | [-230; 285]       |                                 | [-14,0; 17,3]     |

| Kreis        | Bevölkerung | Absolute Todesfälle |                   | Todesfälle/100.000<br>Einwohner |                   | Todesfälle/Gesamt mortalität [%] |                   |
|--------------|-------------|---------------------|-------------------|---------------------------------|-------------------|----------------------------------|-------------------|
|              |             | COVID-19            | Übersterblichkeit | COVID-19                        | Übersterblichkeit | COVID-19                         | Übersterblichkeit |
| Mayen-       | 214.514     | 178                 | 91                | 82,9                            | 42                | 4,3                              | 2,2               |
| Koblenz      |             |                     | [-532; 677]       |                                 | [-248; 316]       |                                  | [-12,9; 16,4]     |
| Neustadt adW | 53.715      | 38                  | -22               | 70,7                            | -41               | 3,4                              | -2,0              |
|              |             |                     | [-333; 263]       |                                 | [-620; 490]       |                                  | [-30,0; 23,7]     |
| Neuwied      | 183.577     | 194                 | 88                | 105,7                           | 48                | 5,3                              | 2,4               |
|              |             |                     | [-493; 633]       |                                 | [-269; 345]       |                                  | [-13,4; 17,2]     |
| Pirmasens    | 40.319      | 54                  | 105               | 133,9                           | 261               | 4,8                              | 9,3               |
|              |             |                     | [-189; 371]       |                                 | [-469; 920]       |                                  | [-16,8; 33,0]     |
| Rhein-       | 103.330     | 103                 | 122               | 99,6                            | 118               | 4,8                              | 5,7               |
| Hunsrück-    |             |                     | [-300; 509]       |                                 | [-290; 493]       |                                  | [-14,1; 23,9]     |
| Kreis        |             |                     |                   |                                 |                   |                                  |                   |

| Kreis                  | Bevölkerung | Absolute Todesfälle |                    | Todesfälle/100.000<br>Einwohner |                    | Todesfälle/Gesamt mortalität [%] |                       |
|------------------------|-------------|---------------------|--------------------|---------------------------------|--------------------|----------------------------------|-----------------------|
|                        |             | COVID-19            | Übersterblichkeit  | COVID-19                        | Übersterblichkeit  | COVID-19                         | Übersterblichkeit     |
|                        |             |                     |                    |                                 |                    |                                  |                       |
| Rhein-Lahn-<br>Kreis   | 122.235     | 98                  | 104<br>[-367; 541] | 80,1                            | 85<br>[-300; 442]  | 3,8                              | 4,0 [-14,3; 21,1]     |
| Rhein-Pfalz-<br>Kreis  | 156.022     | 230                 | 150<br>[-361; 631] | 147,3                           | 96<br>[-232; 404]  | 7,6                              | 5,0 [-11,9; 20,9]     |
| Speyer                 | 50.574      | 85                  | 113<br>[-168; 366] | 167,8                           | 223<br>[-333; 723] | 8,2                              | 10,8 [-16,1; 35,1]    |
| Südliche<br>Weinstraße | 110.807     | 118                 | -38<br>[-470; 358] | 106,4                           | -34<br>[-424; 323] | 5,7                              | -1,8 [-22,8; 17,4]    |
| Südwestpfalz           | 94.437      | 85                  | -88<br>[-523; 310] | 90,0                            | -93<br>[-554; 328] | 4,2                              | -4,4<br>[-26,1; 15,4] |

| Kreis                | Bevölkerung | Absolute Todesfälle |                     | Todesfälle/100.000<br>Einwohner |                     | Todesfälle/Gesamt mortalität [%] |                       |
|----------------------|-------------|---------------------|---------------------|---------------------------------|---------------------|----------------------------------|-----------------------|
|                      |             | COVID-19            | Übersterblichkeit   | COVID-19                        | Übersterblichkeit   | COVID-19                         | Übersterblichkeit     |
|                      |             |                     |                     |                                 |                     |                                  |                       |
| Trier                | 107.523     | 30                  | -86<br>[-479; 278]  | 27,9                            | -80<br>[-446; 258]  | 1,8                              | -5,0<br>[-28,0; 16,3] |
| Trier-<br>Saarburg   | 150.634     | 95                  | -162<br>[-662; 311] | 63,0                            | -107<br>[-439; 207] | 3,6                              | -6,1<br>[-25,1; 11,8] |
| Vulkaneifel          | 60.289      | 61                  | 22<br>[-313; 325]   | 101,3                           | 36<br>[-519; 539]   | 4,6                              | 1,7<br>[-23,7; 24,6]  |
| Westerwald-<br>kreis | 202.655     | 156                 | -57<br>[-656; 504]  | 76,9                            | -28<br>[-324; 249]  | 4,2                              | -1,5<br>[-17,6; 13,6] |
| Worms                | 85.819      | 94                  | -56<br>[-425; 282]  | 109,6                           | -65<br>[-495; 329]  | 6,2                              | -3,7<br>[-28,1; 18,6] |

| Kreis | Bevölkerung | Absolute Todesfälle |                   | Todesfälle/100.000 Einwohner |                    | Todesfälle/Gesamt mortalität [%] |                     |
|-------|-------------|---------------------|-------------------|------------------------------|--------------------|----------------------------------|---------------------|
|       |             | COVID-19            | Übersterblichkeit | COVID-19                     | Übersterblichkeit  | COVID-19                         | Übersterblichkeit   |
|       |             | Zweibrücken         | 33.699            | 9                            | -37<br>[-282; 182] | 26,7                             | -110<br>[-837; 540] |

## 5 Literatur

1. German Federal Statistical Office. Sterbefälle (2021) Fallzahlen nach Tagen, Wochen, Monaten, Altersgruppen, Geschlecht und Bundesländern für Deutschland 2016 – 2021. <https://www.destatis.de/DE/Themen/Gesellschaft-Umwelt/Bevoelkerung/Sterbefaelle-Lebenserwartung/sterbefallzahlen.html>  
Zugegriffen: 3. September 2021.
2. Kroll LE, Schumann M, Hoebel J, Lampert T (2017) Regionale Unterschiede in der Gesundheit - Entwicklung eines sozioökonomischen Deprivationsindex für Deutschland. *Journal of Health Monitoring* 2:103–20.
3. Robert Koch Institut FG 28 (2021) Soziale Determinanten der Gesundheit. German Index of Socioeconomic Deprivation <https://github.com/GISD-FG28/GISD>  
Zugegriffen: 24. August 2021.
4. Robert Koch Institute (2021) SurvStat@RKI 2.0 Influenza Data <https://survstat.rki.de/>  
Zugegriffen: 3. September 2021.
5. Robert Koch Institute (2021) COVID-19 Todesfälle nach Sterbedatum [https://www.rki.de/DE/Content/InfAZ/N/Neuartiges\\_Coronavirus/Projekte\\_RKI/COVID-19\\_Todesfaelle.html](https://www.rki.de/DE/Content/InfAZ/N/Neuartiges_Coronavirus/Projekte_RKI/COVID-19_Todesfaelle.html)  
Zugegriffen: 3. September 2021.
6. Robert Koch Institute (2021) RKI COVID19 Dashboard <https://corona.rki.de/>  
Zugegriffen: 3. September 2021.
7. Robert Koch Institute (2021) RKI COVID19 Dashboard Data [https://npgeo-corona-npgeo-de.hub.arcgis.com/datasets/dd4580c810204019a7b8eb3e0b329dd6\\_0/data](https://npgeo-corona-npgeo-de.hub.arcgis.com/datasets/dd4580c810204019a7b8eb3e0b329dd6_0/data)  
Zugegriffen: 3. September 2021.
8. Bürkner PC (2017) brms: An R package for Bayesian multilevel models using Stan. *Journal of Statistical Software* 80.
9. Carpenter B, Gelman A, Hoffman MD, Lee D, Goodrich B, Betancourt M, et al (2017) Stan: A probabilistic programming language. *Journal of Statistical Software* 76.
